# Supplementary material for: Migraine, Tension-Type Headache and Parkinson’s Disease: A Systematic Review and Meta-Analysis
Source: MDPI journal article supplement (doi:10.3390/medicina58111684), 2022-11-20
Supplement: s1 [file s1]

**Table S1** Quality evaluation of case-control studies according to the Newcastle-Ottawa Scale (NOS) and modified NOS (for cross-sectional studies)

| <b>Cross-sectional Studies</b>    | <b>Selection</b> | <b>Comparability</b> | <b>Exposure</b> | <b>NOS score</b> |
|-----------------------------------|------------------|----------------------|-----------------|------------------|
| <b>Indo, 1983</b>                 | *                |                      | **              | 3/9              |
| <b>Barbanti, 2000</b>             | ***              | *                    | **              | 6/9              |
| <b>Cubo, 2004</b>                 | ***              | *                    | **              | 6/9              |
| <b>de Oliveira Vilaça, 2015</b>   | ***              | *                    | **              | 6/9              |
| <b>Sampaio Rocha-Filho, 2020</b>  | ***              | *                    | **              | 6/9              |
| <b>Nunes, 2013</b>                | ***              | *                    | **              | 6/9              |
| <b>Suzuki, 2018</b>               | ***              | *                    | **              | 6/9              |
| <b>Case-Control Studies</b>       |                  |                      |                 |                  |
| <b>Meco, 1988</b>                 | *                | **                   | **              | 5/9              |
| <b>Heilbron, 2019</b>             | ***              | *                    | **              | 6/9              |
| <b>de Oliveira Vilaça, 2015#</b>  | ***              | *                    | **              | 6/9              |
| <b>Nunes, 2013#</b>               | ***              | *                    | **              | 6/9              |
| <b>Suzuki, 2018#</b>              | ***              | *                    | **              | 6/9              |
| <b>Prospective Cohort Studies</b> |                  |                      |                 |                  |
| <b>Scher, 2014</b>                | ***              | **                   | **              | 7/9              |
| <b>Wang, 2016</b>                 | ***              | **                   | **              | 7/9              |
| <b>Yang, 2017</b>                 | ***              | **                   | **              | 7/9              |

Selection: a: Representativeness of the exposed cohort; b: Selection of the non-exposed cohort; c: Ascertainment of exposure; D: Demonstration that outcome of interest was not present at start of study Comparability: e: Comparability of Cohorts on Basis of Design or Analysis Time to Follow-Up Exposure: f: Assessment of outcome; g: Follow-up long enough for outcomes to occur; h: Adequacy of follow-up of cohorts .The number of \* corresponds to the number of items assessed positively in each category #these studies are included in more than one study design because different outcomes correspond to different designs (prevalence-cross sectional and association estimates-case control).
