# Supplementary material for: Migraine, Tension-Type Headache and Parkinson’s Disease: A Systematic Review and Meta-Analysis
Source: MDPI journal article supplement (doi:10.3390/medicina58111684), 2022-11-20
Supplement: s1 [file s1]

Standard error of FTT effect estimates

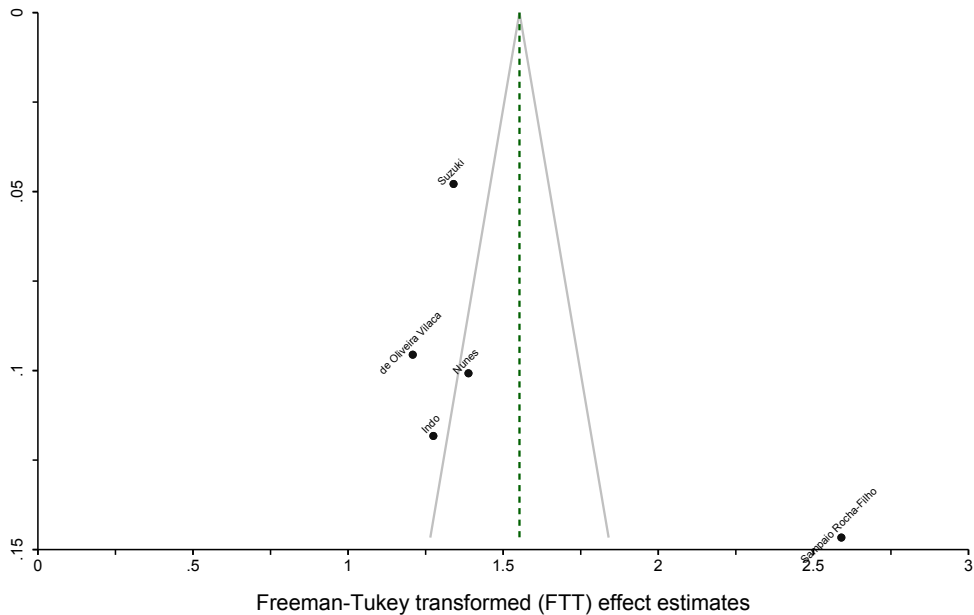

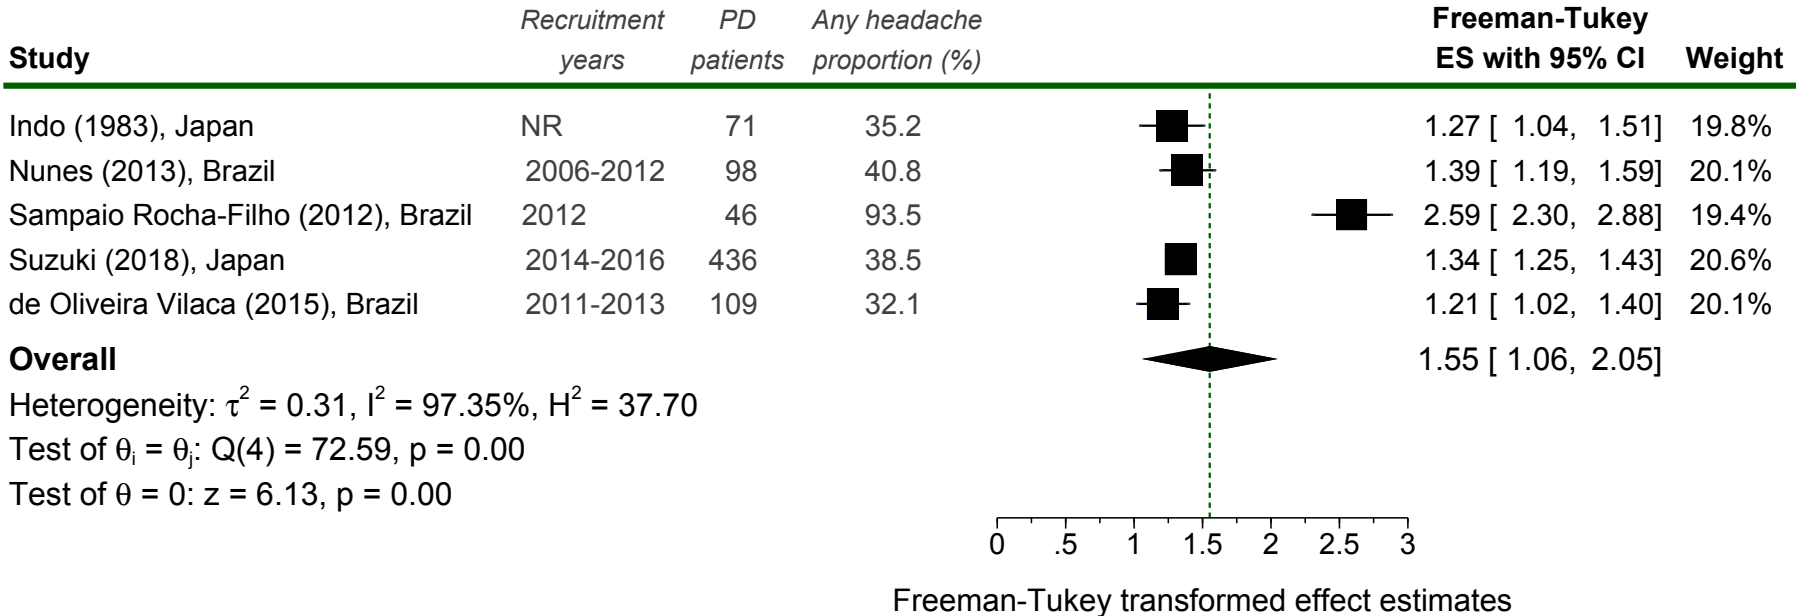

Standard error of FTT effect estimates

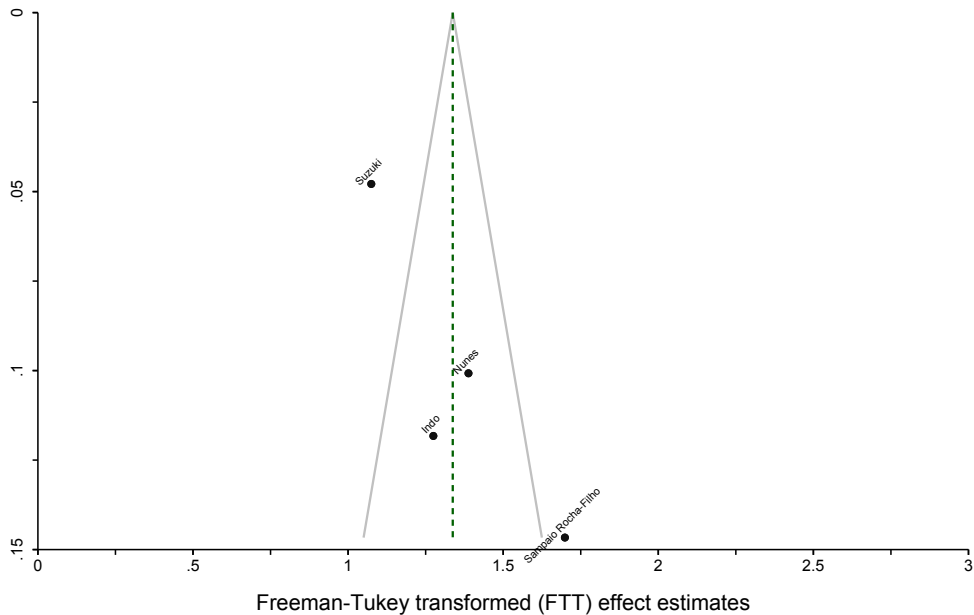

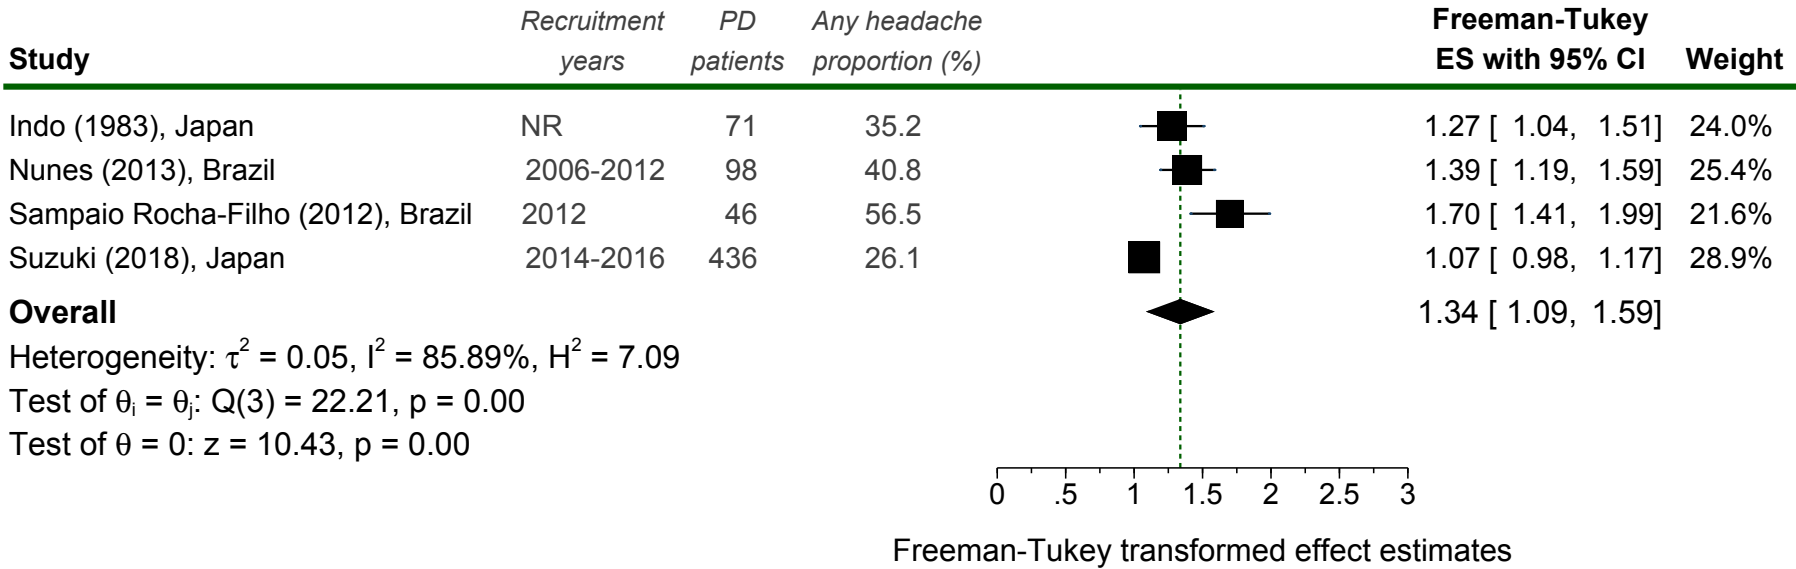

Standard error of FTT effect estimates

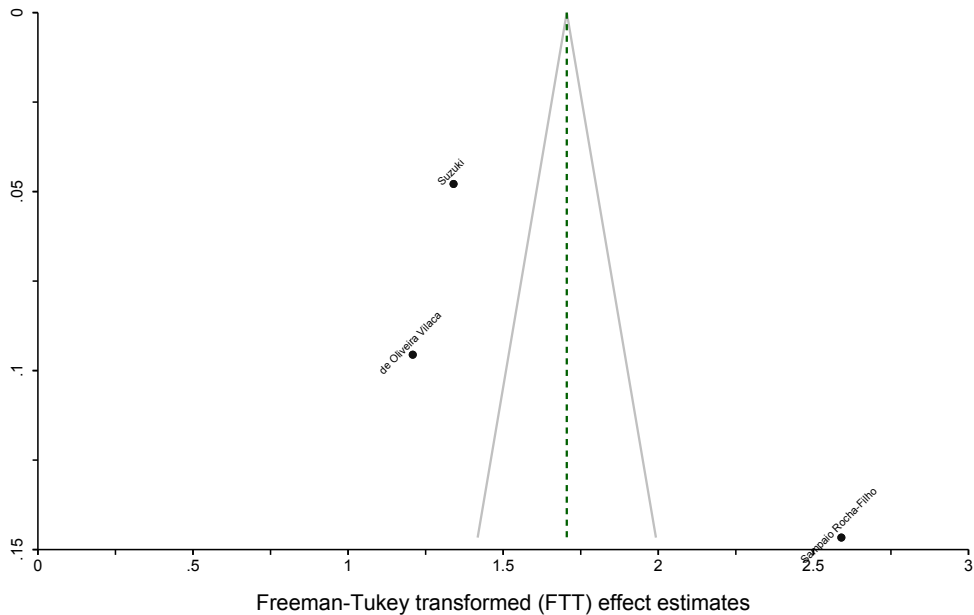

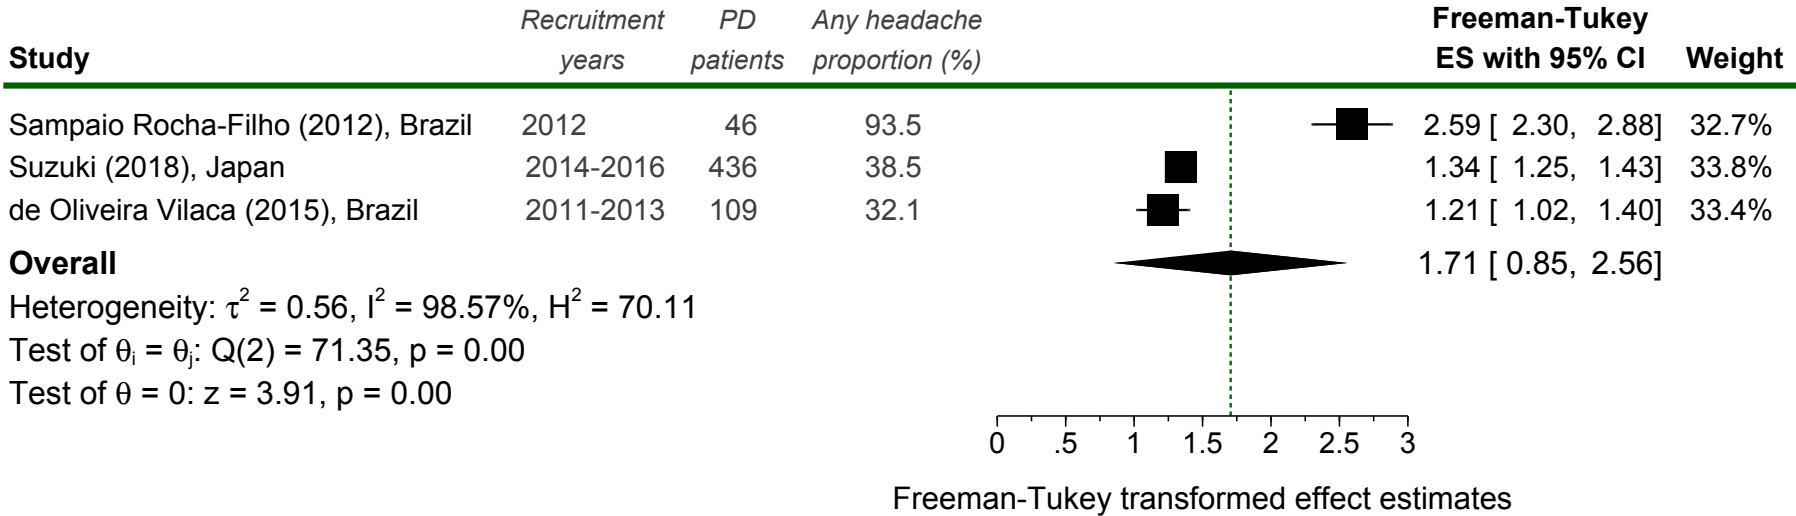

Standard error of FTT effect estimates

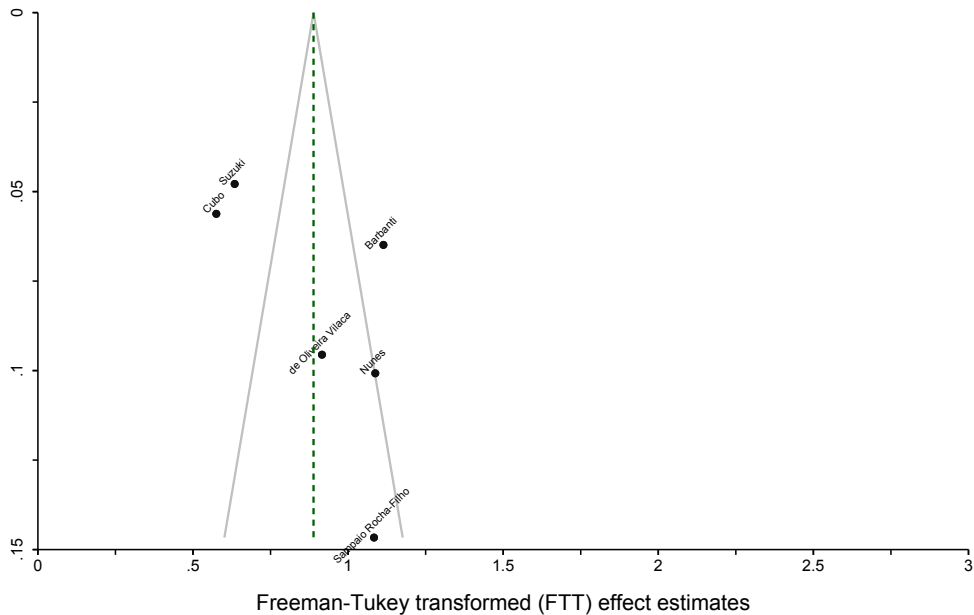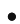

Studies

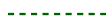

Overall random effect estimate

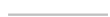

Pseudo-95% CIs

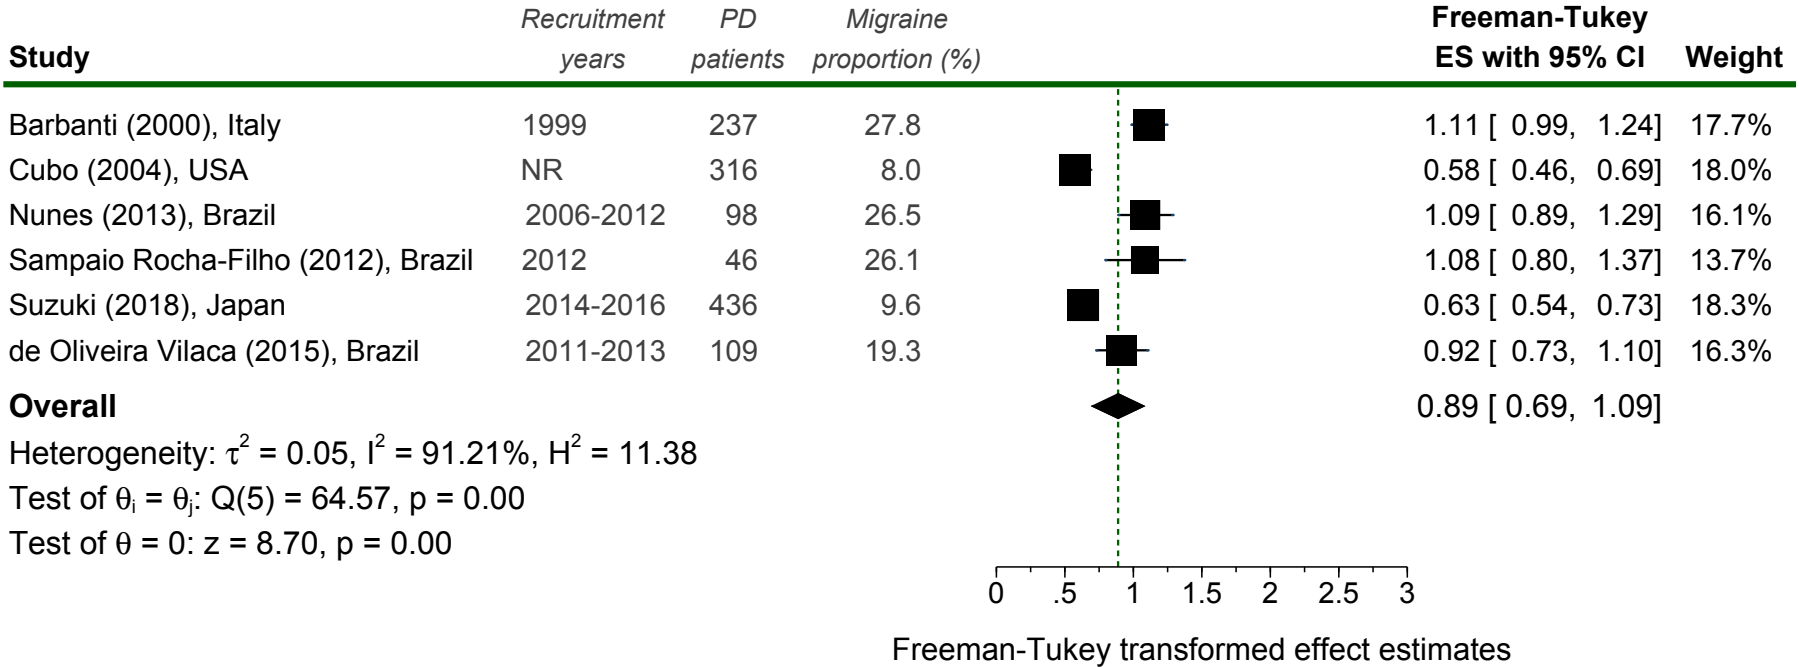



Standard error of FTT effect estimates

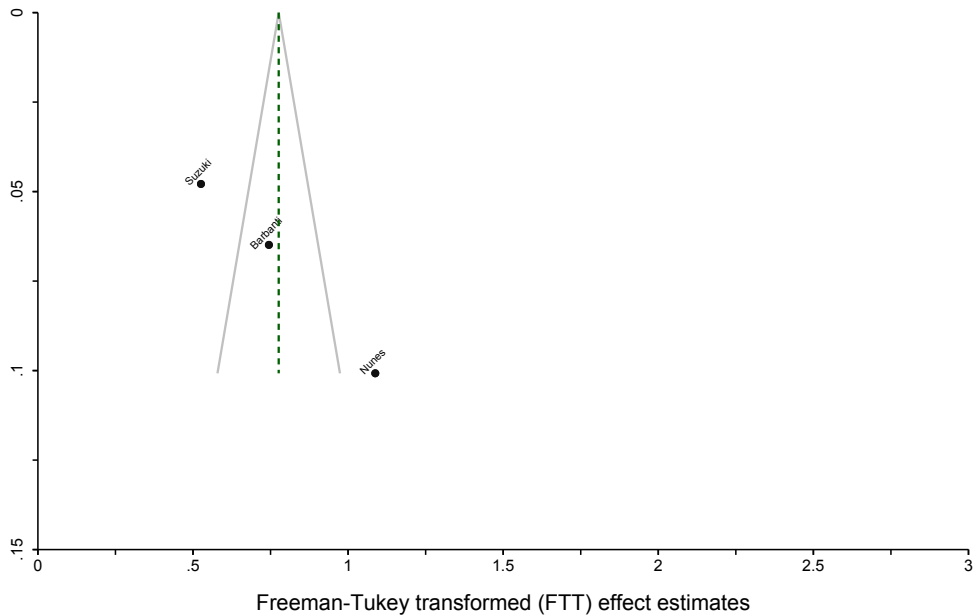

Studies

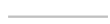

Pseudo-95% CIs

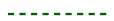

Overall random effect estimate

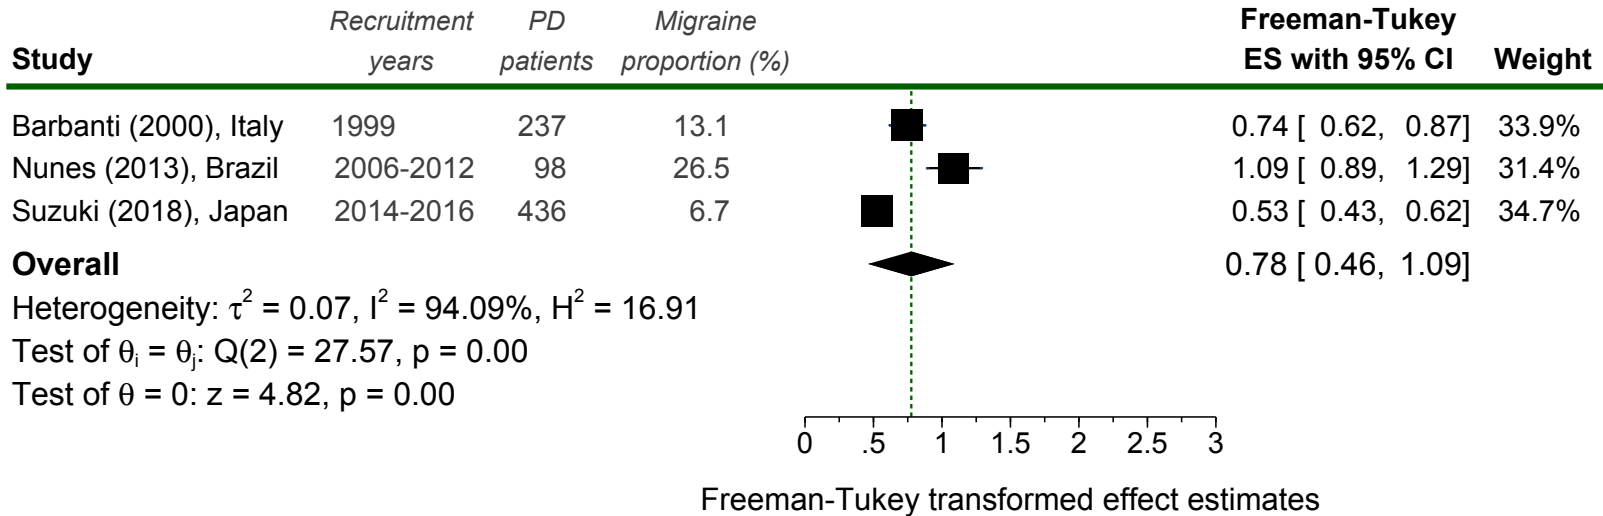

Standard error of FTT effect estimates

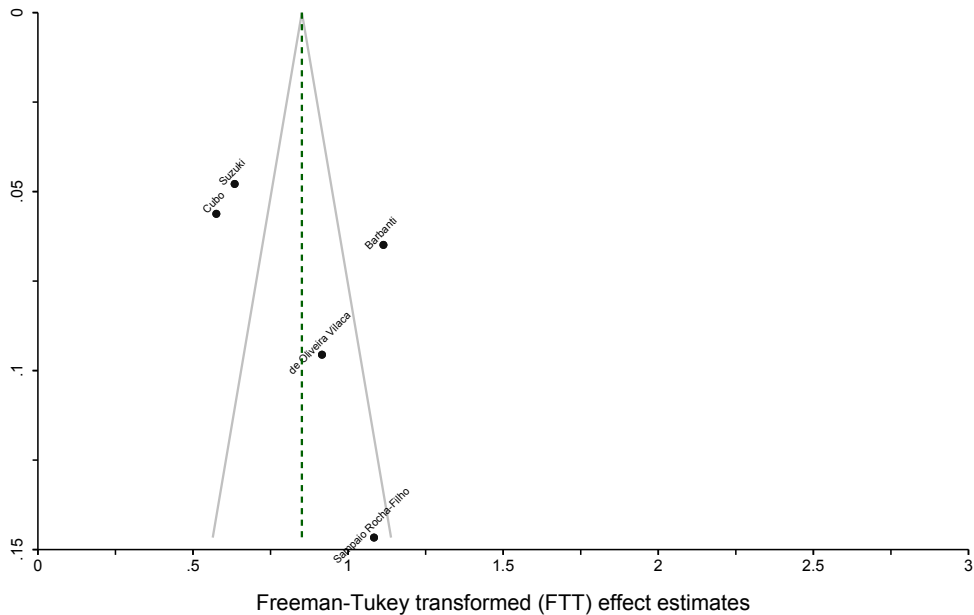

Studies

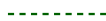

Overall random effect estimate

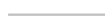

Pseudo-95% CIs

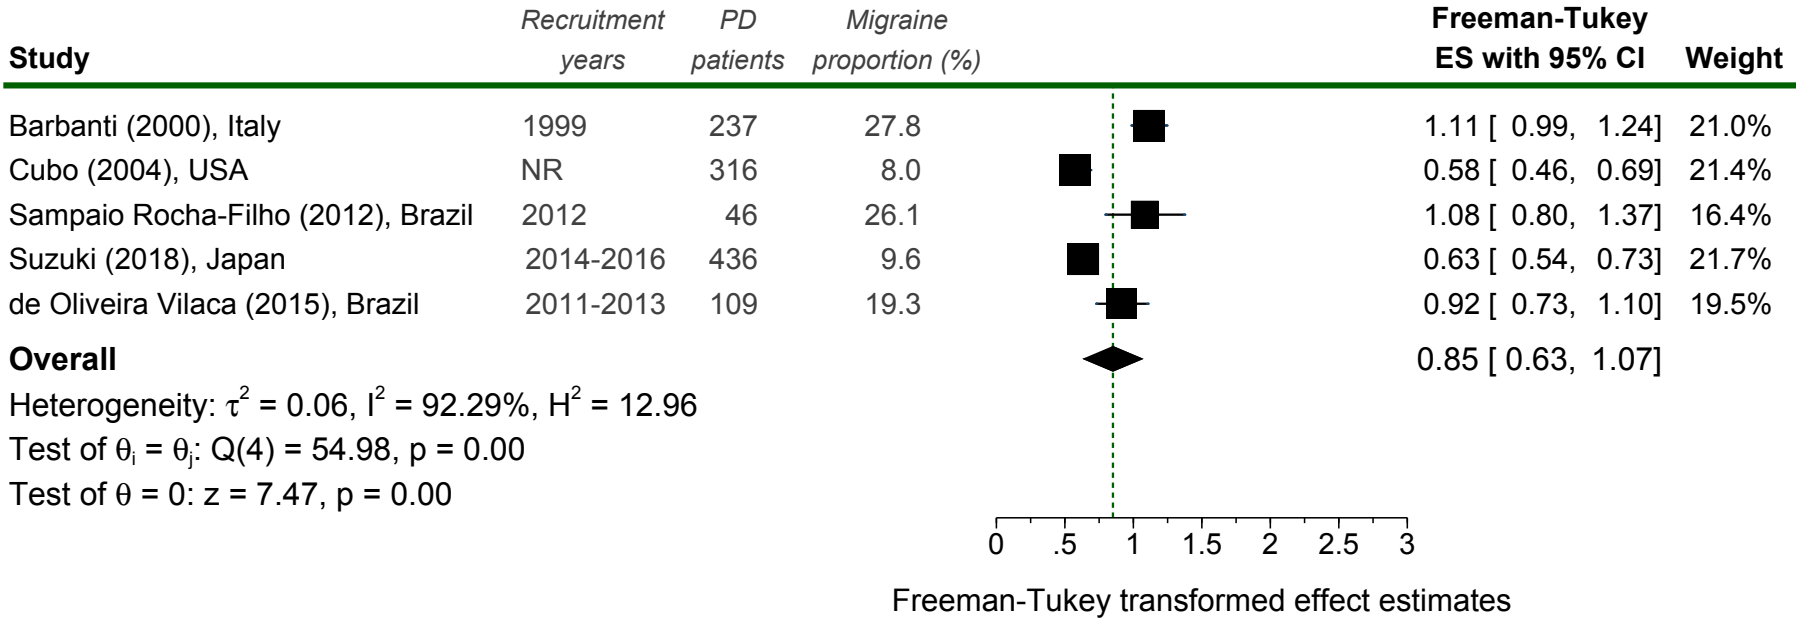

Standard error of FTT effect estimates

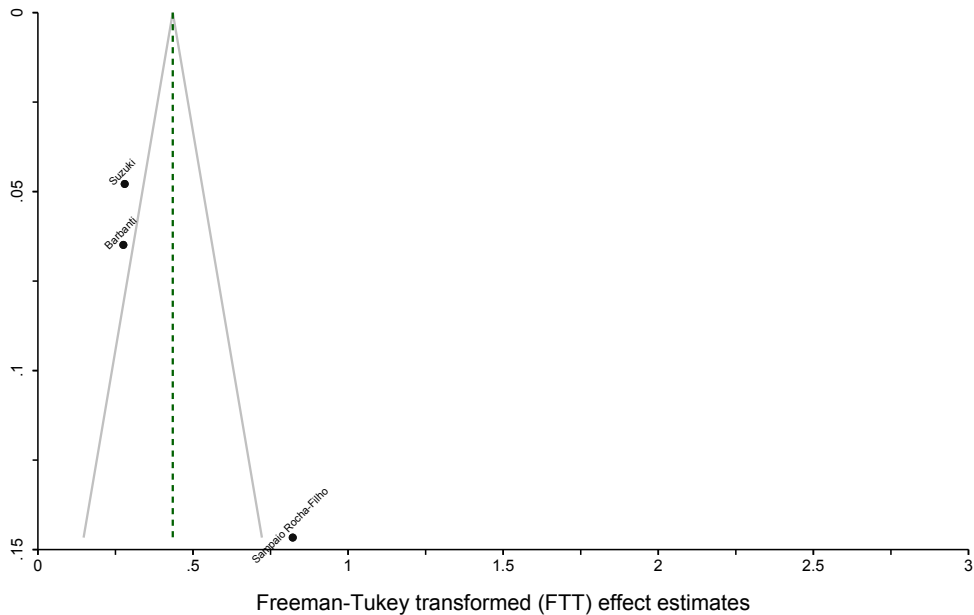

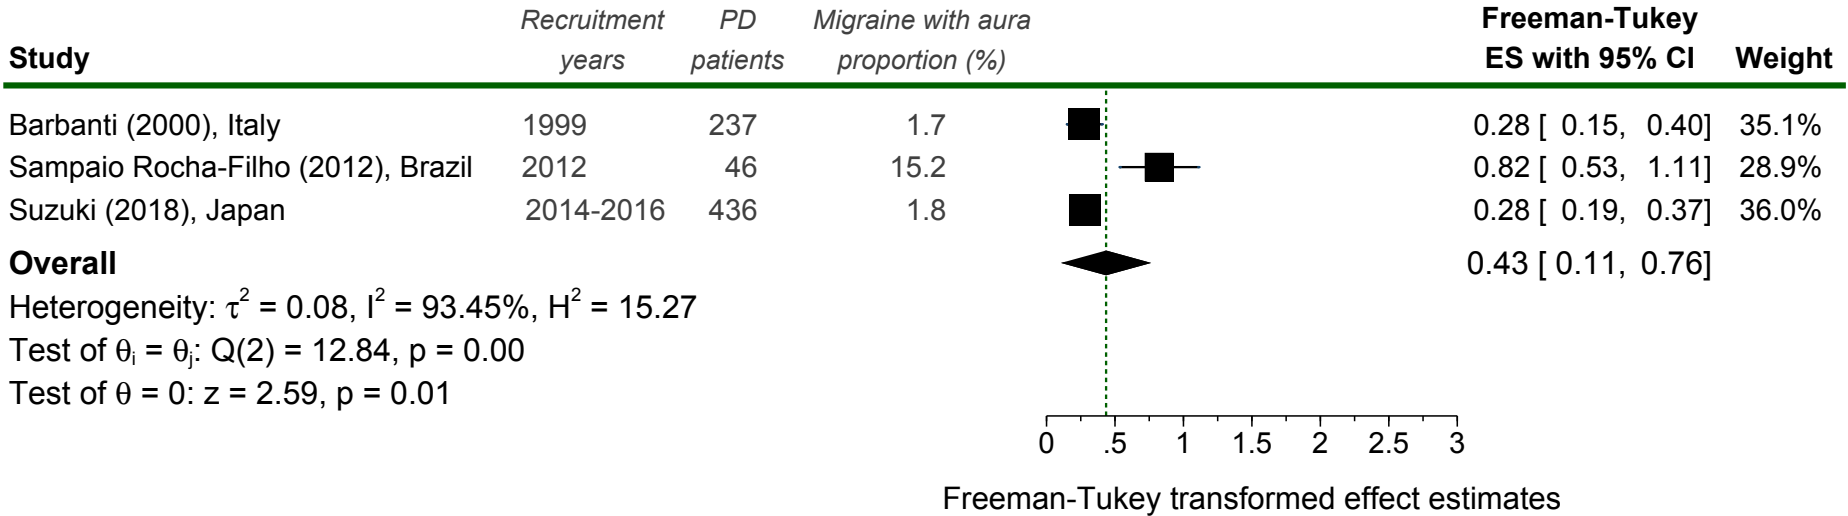

Standard error of FTT effect estimates

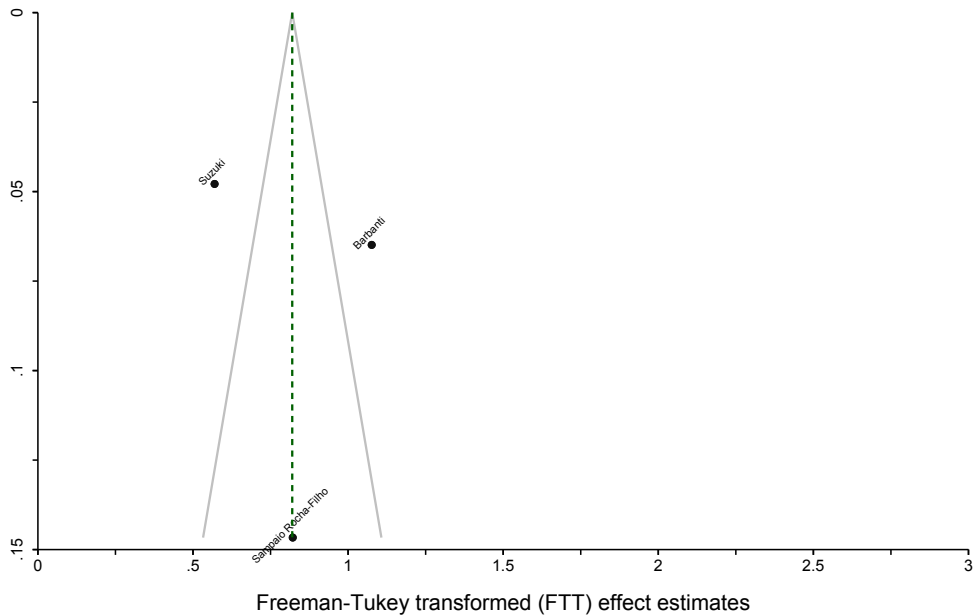

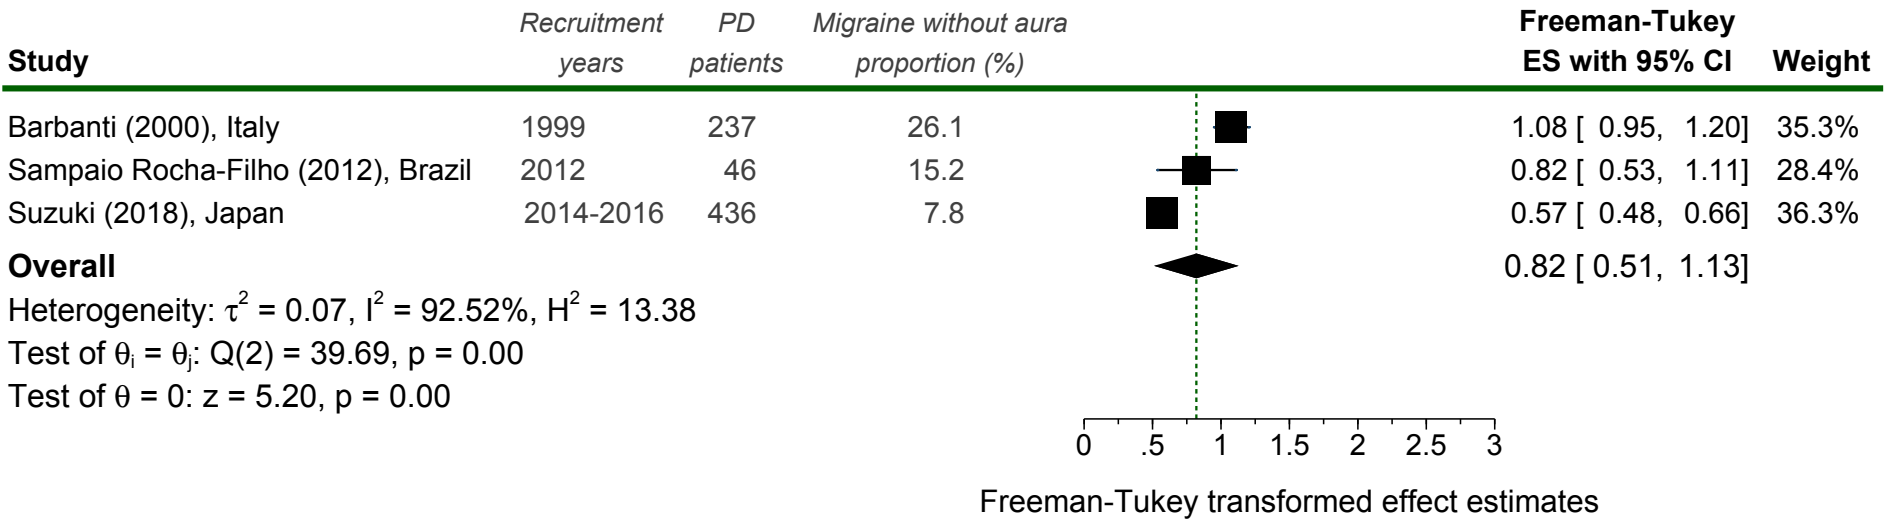



Standard error of FTT effect estimates

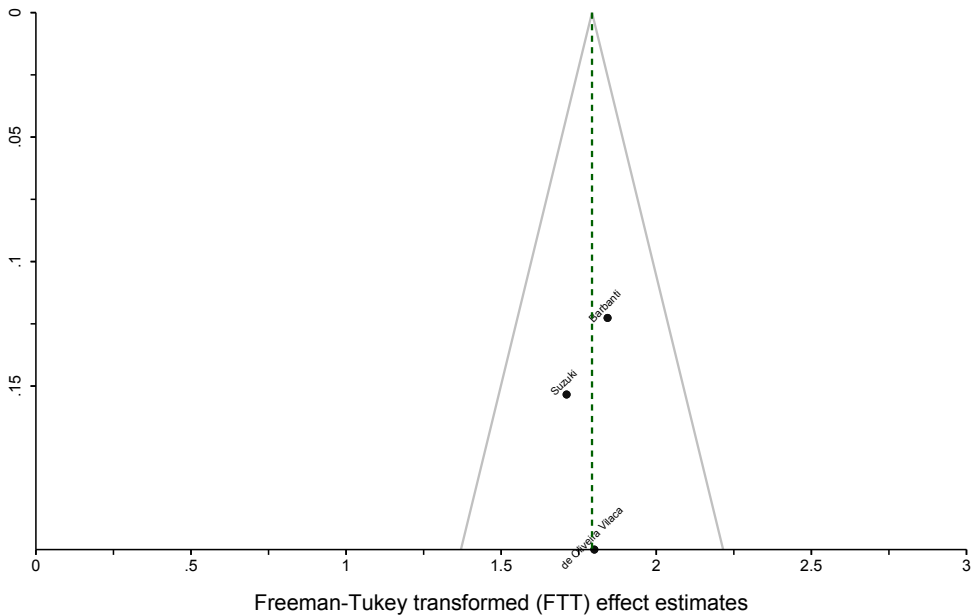

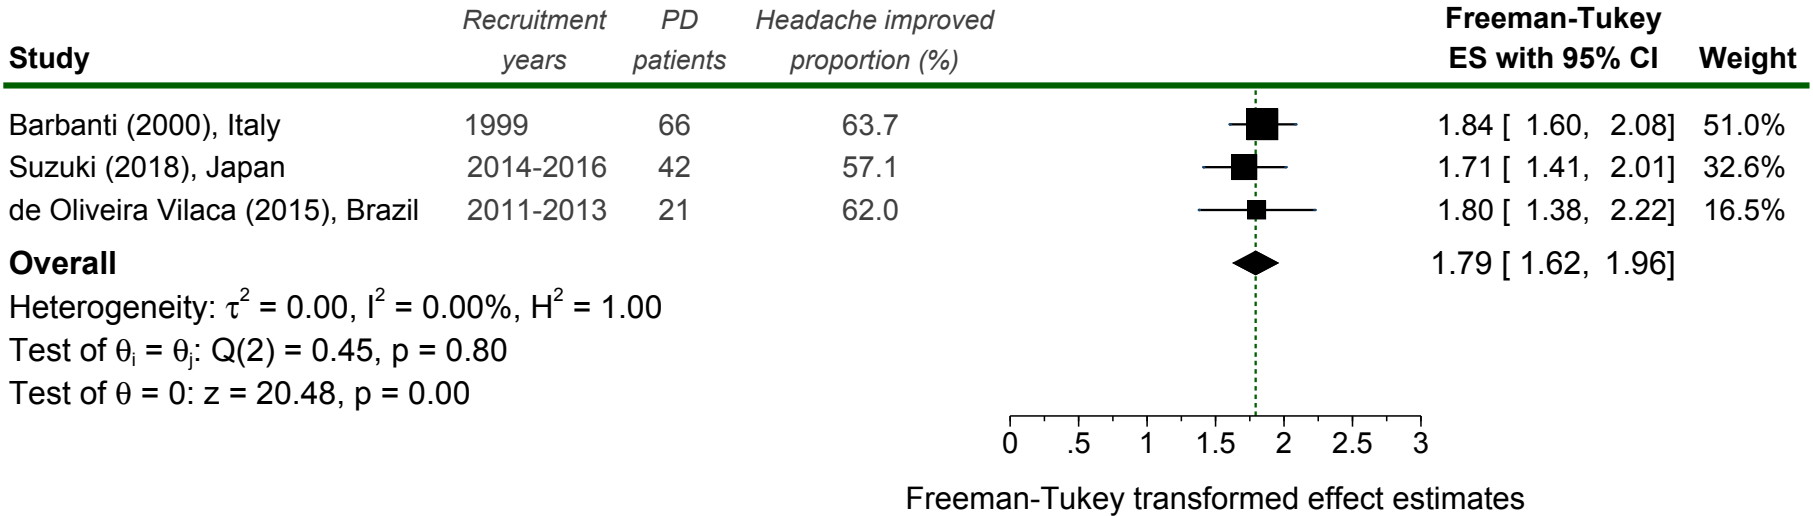

Standard error of SMDs

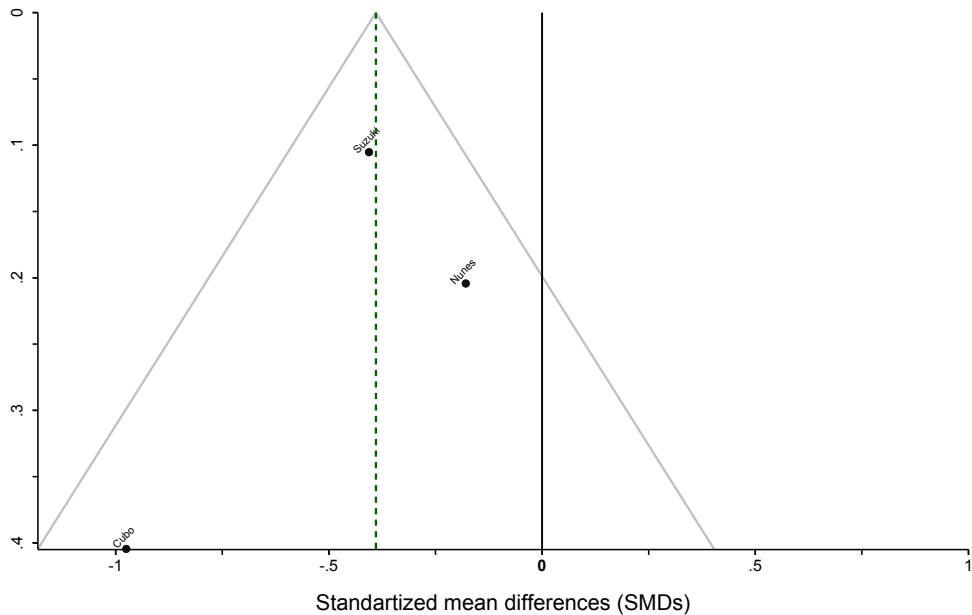

Studies



Overall random effect estimate



Pseudo-95% CIs

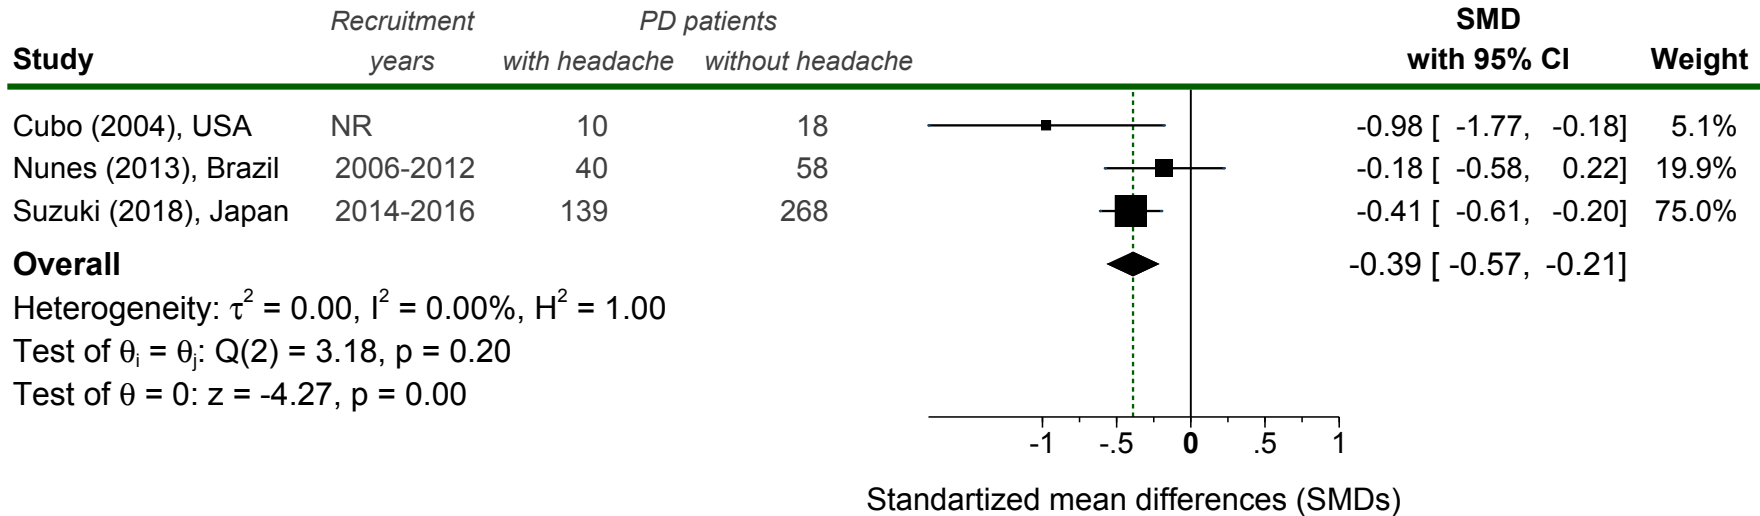

Standard error of SMDs

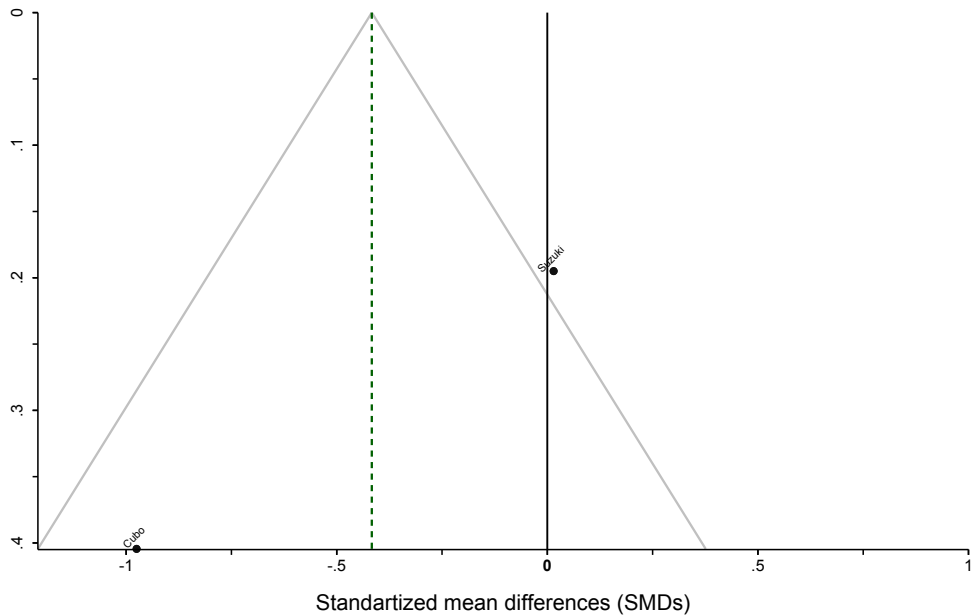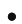

Studies

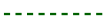

Overall random effect estimate



Pseudo-95% CIs
